# Supplementary material
Source: Springer Nature journal article supplement (https://www.springermedizin.de/resource/supplementary/13000_2011_361_MOESM4_ESM.pdf/9624430)

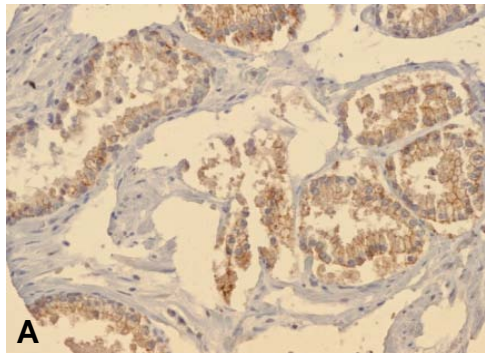

**A**

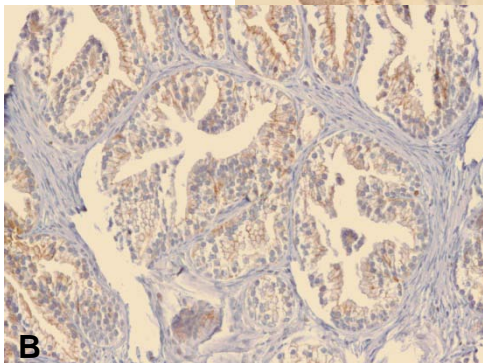

**B**

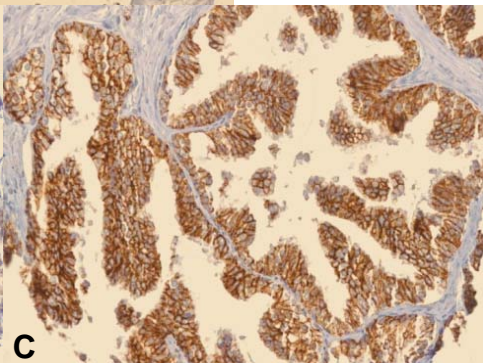

**C**

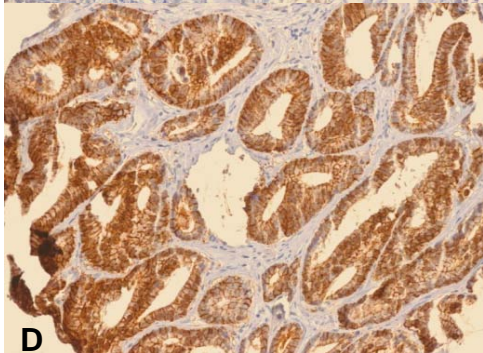

**D**

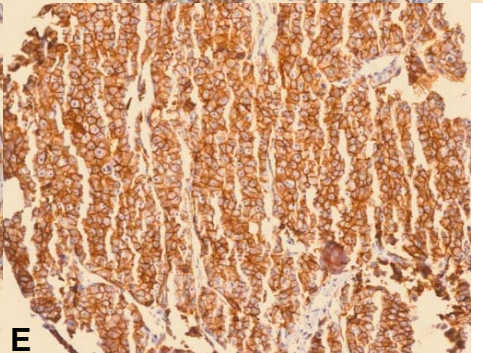

**E**

Supplement: MOESM4 [file 9624430]
